# Supplementary material
Source: HighWire-hosted journal article supplement (https://cmaj.ca/highwire/filestream/58683/field_highwire_adjunct_files/0/salon-rosenberg-1-at.pdf)
Supplement: salon-rosenberg-1-at.pdf [file salon-rosenberg-1-at.pdf]

## Appendix 1: References for “Surgery: Down for the count?”

### References

1. Schlich T. The emergence of modern surgery. In: Brunton D, editor. *Medicine transformed: health, disease and society in Europe, 1800–1939*. Manchester (UK): Manchester University Press; 2004. p. 61-91.
2. Cohen DJ. Cardiothoracic surgery at a crossroads: the impact of disruptive technologic change. *J Cardiothorac Surg* 2007;35:2. Available: [www.cardiothoracicsurgery.org/content/2/1/35](http://www.cardiothoracicsurgery.org/content/2/1/35) . (accessed 2012 Feb. 1).
3. Carey J, Barrett A. Is heart surgery worth it? *Businessweek* 2005 July 18. p.32-6.
4. Zetka JR. *Surgeons and the scope*. Ithaca (NY): Cornell University Press; 2003.
5. Satava RM. Advanced technologies and the future of medicine and surgery. *Yonsei Med J* 2008;49:873-8.
6. Christensen C, Grossman JH, Hwang J. *The innovator’s prescription*. New York (NY): McGraw Hill; 2009.
7. Russell TJ. From my perspective. *Bull Am Coll Surg* 2007;92:4-5.
